# Supplementary material
Source: PubMed Central journal article supplement (PMC9847503)

Kuhn JH *et al.* (2022) 2022 taxonomic update of phylum *Negarnaviricota* (*Riboviria*: *Orthornavirae*), including the large orders *Bunyavirales* and *Mononegavirales*. Arch Virol 167(12). DOI: 10.1007/s00705-022-05546-z (December 2022)

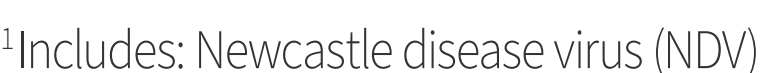

Supplement: NIHMS1854181-supplement-1854181_Sup_Material.pdf [file NIHMS1854181-supplement-1854181_Sup_Material.pdf]
